# Supplementary material for: Prognostic Significance of Amino Acid and Biogenic Amines Profiling in Chronic Kidney Disease
Source: MDPI journal article supplement (doi:10.3390/biomedicines11102775), 2023-10-13
Supplement: s1 [file s1]

**Supplementary Table S1.** Calibration standards.

| <b>ANALYTE</b>                     | <b>Dynamic range of the curve (ng/ml)</b> |
|------------------------------------|-------------------------------------------|
| Acetylcholine                      | 3,12-400                                  |
| Alanine                            | 173,4-88800                               |
| Arginine                           | 679,7-87000                               |
| Asparagine                         | 62,5-20000                                |
| Aspartate                          | 259,37-66400                              |
| Asymmetric dimethylarginine (ADMA) | 7,81-500                                  |
| Citrulline                         | 234,37-60000                              |
| Creatine                           | 62,5-8000                                 |
| Gamma-aminobutyric acid (GABA)     | 3,12-200                                  |
| Glutamate                          | 286,7-146800                              |
| Glutamine                          | 15625-250000                              |
| Glycine                            | 292,2-74800                               |
| Histidine                          | 292,96-154800                             |
| Isoleucine                         | 514-131600                                |
| Kynurenic acid                     | 187,5-6000                                |
| Kynurenine                         | 9,76-5000                                 |
| Leucine                            | 515,6-132000                              |
| Lysine                             | 285,15-146000                             |
| Methionine                         | 3,66-30000                                |
| Phenylalanine                      | 1287,5-82400                              |
| Proline                            | 224,2-114800                              |
| D-Serine                           | 117,18-1875                               |
| L-Serine                           | 117,18-1875                               |
| Serotonin                          | 4,68-600                                  |
| Threonine                          | 232-118800                                |
| Tryptophan                         | 5625-180000                               |
| Tyrosine                           | 706,25-90400                              |
| Valine                             | 457,8-117200                              |

**Supplementary Table S2.** Multiple reaction monitoring conditions for the metabolites.

|    | COMPOUND NAME                              | TRANSITION (M/Z) | FRAGMENTOR (V) | COLLISION ENERGY (V) | RETENTION TIME (MIN) |
|----|--------------------------------------------|------------------|----------------|----------------------|----------------------|
| 1  | Acetylcholine                              | 146-87           | 120            | 15                   | 2.15                 |
|    | D4-Acetylcholine                           | 150-91           | 120            | 15                   | 2.15                 |
| 2  | Alanine                                    | 194-105          | 120            | 20                   | 10.08                |
|    | 13C6Bz-Alanine                             | 200-111          | 120            | 20                   | 10.08                |
| 3  | Arginine                                   | 279-105          | 135            | 30                   | 7.68                 |
|    | 13C6Bz-Arginine                            | 285-111          | 135            | 30                   | 7.68                 |
| 4  | Asparagine                                 | 237-105          | 120            | 20                   | 7.46                 |
|    | 13C6Bz-Asparagine                          | 243-111          | 120            | 20                   | 7.46                 |
| 5  | Aspartate                                  | 238-105          | 120            | 10                   | 8.46                 |
|    | 13C6Bz-Aspartate                           | 244-111          | 120            | 10                   | 8.46                 |
| 6  | Asymmetric dimethylarginine (ADMA)         | 307.2-105        | 70             | 20                   | 8.04                 |
|    | 13C6Bz- Asymmetric dimethylarginine (ADMA) | 313-111          | 70             | 20                   | 8.04                 |
| 7  | Citrulline                                 | 280-105          | 120            | 20                   | 8.28                 |
|    | 13C6Bz-Citrulline                          | 286-111          | 120            | 20                   | 8.28                 |
| 8  | Creatine                                   | 132.1-90.2       | 90             | 9                    | 2                    |
| 9  | Gamma-aminobutyric acid (GABA)             | 208-105          | 120            | 10                   | 10.36                |
|    | 13C6Bz-Gamma-aminobutyric acid (GABA)      | 214-111          | 120            | 10                   | 10.36                |
| 10 | Glutamate                                  | 252-105          | 120            | 20                   | 9.08                 |
|    | 13C6Bz-Glutamate                           | 258-111          | 120            | 20                   | 9.08                 |
| 11 | Glutamine                                  | 251-105          | 120            | 20                   | 8.17                 |
|    | 13C6Bz-Glutamine                           | 257-111          | 120            | 20                   | 8.17                 |
| 12 | Glycine                                    | 180-105          | 120            | 10                   | 8.79                 |
|    | 13C6Bz-Glycine                             | 186-111          | 120            | 10                   | 8.79                 |
| 13 | Histidine                                  | 260-110          | 130            | 20                   | 6.9                  |
|    | 13C6Bz-Histidine                           | 266-110          | 130            | 20                   | 6.9                  |
| 14 | Isoleucine                                 | 236-105          | 120            | 30                   | 15.9                 |
|    | 13C6Bz-Isoleucine                          | 242-111          | 120            | 30                   | 15.9                 |
| 15 | Kynurenic acid                             | 294-105          | 120            | 30                   | 18.5                 |
|    | 13C6Bz-Kynurenic acid                      | 300-111          | 120            | 30                   | 18.5                 |
| 16 | Kynurenine                                 | 417-122          | 120            | 10                   | 19.02                |
|    | 13C6Bz-Kynurenine                          | 429-128          | 120            | 10                   | 19.02                |
| 17 | Leucine                                    | 236-105          | 120            | 30                   | 16.31                |
|    | 13C6Bz-Leucine                             | 242-111          | 120            | 30                   | 16.31                |
| 18 | Lysine                                     | 355-188          | 120            | 20                   | 14.7                 |
|    | 13C6Bz-Lysine                              | 367-194          | 120            | 20                   | 14.7                 |
| 19 | Methionine                                 | 254-105          | 120            | 15                   | 13.69                |
|    | 13C6Bz-Methionine                          | 260-111          | 120            | 15                   | 13.69                |
| 20 | Phenylalanine                              | 270-120          | 120            | 10                   | 16.48                |
|    | 13C6Bz-Phenylalanine                       | 276-120          | 120            | 10                   | 16.48                |
| 21 | Proline                                    | 220-105          | 120            | 20                   | 11.03                |
|    | 13C6Bz-Proline                             | 226-111          | 120            | 20                   | 11.03                |
| 22 | D-Serine                                   | 210-105          | 120            | 20                   | 7.70                 |
|    | 13C6Bz-D-Serine                            | 216-111          | 120            | 20                   | 7.70                 |
| 23 | L-Serine                                   | 210-105          | 120            | 20                   | 7.99                 |
|    | 13C6Bz-L-Serine                            | 216-111          | 120            | 20                   | 7.99                 |
| 24 | Serotonine                                 | 385-264          | 140            | 20                   | 20.6                 |
|    | 13C6Bz-Serotonine                          | 397-270          | 140            | 20                   | 20.6                 |
| 25 | Threonine                                  | 224-105          | 140            | 20                   | 16.5                 |
|    | 13C6Bz-Threonine                           | 230-111          | 140            | 20                   | 16.5                 |
| 26 | Tryptophan                                 | 309-159          | 120            | 10                   | 16.54                |
|    | 13C6Bz-Tryptophan                          | 315-159          | 120            | 10                   | 16.54                |
| 27 | Tyrosine                                   | 390-105          | 120            | 30                   | 19.67                |
|    | 13C6Bz-Tyrosine                            | 402-111          | 120            | 30                   | 19.67                |
| 28 | Valine                                     | 222-105          | 120            | 30                   | 13.61                |
|    | 13C6Bz-Valine                              | 228-111          | 120            | 30                   | 13.61                |

**Supplementary Table S3.** Multivariate regression parameters for the effect of renal status

(control, chronic kidney disease or end-stage kidney disease) on the metabolites' plasma

levels. Models were adjusted for age, sex, body-mass index, hypertension, smoking status and diabetes.

|                | <b>B</b> | <b>95%CI</b>        | <b>SE</b> | <b>Beta</b> | <b>p-value</b> |
|----------------|----------|---------------------|-----------|-------------|----------------|
| Alanine        | -190.15  | (-212.95 - -167.28) | 11.63     | -0.547      | <0.0001        |
| Arginine       | -27.45   | (-31.72 - -23.18)   | 2.18      | -0.451      | <0.0001        |
| Asparagine     | -9.9     | (-11.46 - -8.35)    | 0.79      | -0.434      | <0.0001        |
| Aspartate      | -13.84   | (-16.63 - -11.08)   | 1.42      | -0.358      | <0.0001        |
| Citrulline     | 13.41    | (9.4 - 17.42)       | 2.04      | 0.242       | <0.0001        |
| Glycine        | 22.12    | (15.85 - 28.39)     | 3.19      | 0.267       | <0.0001        |
| Glutamate      | -57.84   | (-65.62 - -50.06)   | 3.96      | -0.509      | <0.0001        |
| Glutamine      | 30.11    | (-1.12 - 61.35)     | 15.91     | 0.073       | 0.059          |
| Histidine      | -17.38   | (-22.02 - -12.73)   | 2.37      | -0.283      | <0.0001        |
| Isoleucine     | -31.76   | (-39.12 - -24.41)   | 3.75      | -0.353      | <0.0001        |
| Leucine        | -301.77  | (-356.75 - -246.79) | 28.01     | -0.387      | <0.0001        |
| Lysine         | -47.26   | (-56.45 - -38.07)   | 4.68      | -0.369      | <0.0001        |
| Methionine     | -3.97    | (-5.11 - -2.83)     | 0.58      | -0.267      | <0.0001        |
| Phenylalanine  | -118.01  | (-185.38 - -50.64)  | 34.32     | -0.137      | 0.001          |
| Proline        | -58.57   | (-79.01 - -38.12)   | 10.42     | -0.221      | <0.0001        |
| D-Serine       | 0.07     | (0.03 - 0.1)        | 0.02      | 0.152       | <0.0001        |
| L-Serine       | -24.6    | (-28.09 - -21.11)   | 1.78      | -0.461      | <0.0001        |
| Tyrosine       | -215.74  | (-255.46 - -176.02) | 20.23     | -0.381      | <0.0001        |
| Threonine      | -87.45   | (-100.22 - -74.69)  | 6.5       | -0.458      | <0.0001        |
| Tryptophan     | -49.48   | (-53.56 - -45.42)   | 2.07      | -0.689      | <0.0001        |
| Valine         | -175.51  | (-202.94 - -148.09) | 13.97     | -0.454      | <0.0001        |
| Acetylcholine  | 0.16     | (0.12 - 1)          | 0.02      | 0.271       | <0.0001        |
| Kynurenic acid | -0.49    | (-0.56 - -0.42)     | 0.04      | -0.498      | <0.0001        |
| ADMA           | -0.29    | (-0.32 - -0.27)     | 0.01      | -0.693      | <0.0001        |
| Creatine       | -5.9     | (-6.83 - -4.96)     | 0.48      | -0.435      | <0.0001        |
| GABA           | -0.08    | (-0.09 - -0.08)     | 0.004     | -0.617      | <0.0001        |
| Kynurenine     | -0.02    | (-0.13 - 0.1)       | 0.06      | -0.012      | 0.755          |
| Serotonin      | -0.22    | (-0.24 - -0.2)      | 0.01      | -0.663      | <0.0001        |

B, regression coefficient; 95%CI, 95% confidence intervals; SE, standard error; Beta, standardized coefficient
